# Tracing DAY-ZERO and Forecasting the Fade out of the COVID-19 Outbreak in Lombardy, Italy: A Compartmental Modelling and Numerical Optimization Approach

Lucia Russo

*Consiglio Nazionale delle Ricerche, Institute of Science and Technology for Energy and Sustainable Mobility, Napoli, Italy*

Cleo Anastassopoulou

*Department of Microbiology, Medical School, University of Athens, Athens, Greece*

Athanasios Tsakris

*Department of Microbiology, Medical School, University of Athens, Athens, Greece*

Gennaro Nicola Bifulco

*Dipartimento di Ingegneria Civile, Edile e Ambientale, Università degli Studi di Napoli Federico II, Napoli, Italy*

Emilio Fortunato Campana

*Consiglio Nazionale delle Ricerche, Dipartimento di Ingegneria, ICT e Tecnologie per l'Energia e i Trasporti, Roma, Italy*

Gerardo Toraldo

*Dipartimento di Matematica e Applicazioni "Renato Caccioppoli", Università degli Studi di Napoli Federico II, Napoli, Italy*

Constantinos Siettos<sup>1</sup>

*Dipartimento di Matematica e Applicazioni "Renato Caccioppoli", Università degli Studi di Napoli Federico II, Napoli, Italy*

---

## Abstract

**Background.** Italy currently constitutes the epicenter of the novel coronavirus disease (COVID-19) pandemic, having surpassed China's death toll. The

---

<sup>1</sup>Corresponding author: [constantinos.siettos@unina.it](mailto:constantinos.siettos@unina.it)

disease is sweeping through Lombardy, which remains in lockdown since the 8th of March. As of the same day, the isolation measures taken in Lombardy have been extended to the entire country. On March 11, the WHO declared COVID-19 pandemic. Here, we provide estimates for: (a) the DAY-ZERO of the outbreak in Lombardy, Italy; (b) the actual number of exposed/infected cases in the total population; (c) the basic reproduction number ( $R_0$ ); (d) the “effective” per-day disease transmission and mortality rates; and, importantly, (e) a forecast for the fade out of the outbreak on the basis of the released data of confirmed cases for Lombardy from February 21 to March 8, the day of lockdown.

**Methods.** To deal with the uncertainty in the number of actual exposed/infected cases in the total population, we address a new compartmental Susceptible/ Exposed/ Infectious/ Recovered/ Dead (SEIRD) model with two compartments of infectious persons: one modelling the total cases in the population and another modelling the confirmed cases. The parameters of the model corresponding to the recovery period, and the time from exposure to the time that an individual starts to be infectious, have been set as reported from clinical studies on COVID-19. For the estimation of the DAY-ZERO of the outbreak in Lombardy, as well as of the “effective” per-day transmission and mortality rates for which no clinical data are available, we have used the SEIRD simulator to fit the data from February 21 to the 8th of March, the lockdown day of Lombardy and of all Italy. This was accomplished by solving a mixed-integer optimization problem with the aid of genetic algorithms. Based on the computed values, we also provide an estimation of the basic reproduction number  $R_0$ . Furthermore, based on an estimation for the reduction in the “effective” transmission rate of the disease as of March 8 that reflects the suspension of almost all activities in Italy, we ran the simulator to forecast the fade out of the epidemic. For this purpose, we considered the reduction in mobility in Lombardy from mobile phone data released on March 17, the effect of social distancing, and the draconian measures taken by the government on March 20 and March 21, 2020.

**Findings.** Based on the proposed methodological procedure, we estimated

that the actual cumulative number of exposed cases in the total population in Lombardy on March 8 was of the order of 15 times the confirmed cumulative number of infected cases. According to this scenario, the DAY-ZERO for the outbreak in Lombardy was the 21st of January 2020. The “effective” per-day disease transmission rate for the period until March 8 was found to be 0.779 (90% CI: 0.777-0.781), while the “effective” per-day mortality rate was found to be 0.0174 (90% CI: 0.0154-0.0192). Based on these values, the basic reproduction rate  $R_0$  was found to be 4.04 (90% CI: 4.03-4.05).

Importantly, simulations show that the fade out of the COVID-19 pandemic in Lombardy is expected to occur by the end of May - early June, 2020, if the draconian, as of March 20 and March 21, measures are maintained.

---

## Introduction

The butterfly effect in chaos theory underscores the sensitive dependence on initial conditions, highlighting the importance of even a small change in the state of a nonlinear system. The emergence of a novel coronavirus, SARS-CoV-2, that caused a viral pneumonia outbreak in Wuhan, Hubei province, China in early December 2019 has evolved into the COVID-19 acute respiratory disease pandemic due to its alarming levels of spread and severity, with a total of 298,393 confirmed infected cases, 91,540 recovered and 12,755 deaths in 167 countries as of March 21, 2020 ([1]). The seemingly far from the epicenter, old continent became the second-most impacted region after Asia Pacific to date, mostly as a result of a dramatic divergence of the epidemic trajectory in Italy, where there have been 42,681 total confirmed infected cases, 6,072 recovered and 4,825 deaths as of March 21, 2020 ([1]).

The second largest outbreak outside of mainland China officially started on January 31, 2020, after two Chinese visitors staying at a central hotel in Rome tested positive for SARS-CoV-2; the couple remained in isolation and was declared recovered on February 26 [2]. A 38-year-old man repatriated back to Italy from Wuhan who was admitted to the hospital in Codogno, Lombardy

on February 21 was the first secondary infection case (“patient 1”). “Patient  
20 0” was never identified by tracing the first Italian citizen’s movements and  
contacts. In less than a week, the explosive increase in the number of cases in  
several bordering regions and autonomous provinces of northern Italy placed  
enormous strain on the decentralized health system. Following an a dramatic  
spike in deaths from COVID-19, Italy transformed into a “red zone”, and the  
25 movement restrictions were expanded to the entire country on the 8th of March.  
All public gatherings were cancelled and school and university closures were  
extended through at least the next month.

In an attempt to assess the dynamics of the outbreak for forecasting purposes  
as well as to estimate epidemiological parameters that cannot be computed  
30 directly based on clinical data, such as the transmission rate of the disease and  
the basic reproduction number  $R_0$ , defined as the expected number of exposed  
cases generated by one infected case in a population where all individuals are  
susceptible, many mathematical modelling studies have already appeared since  
the first confirmed COVID-19 case. The first models mainly focused on the  
35 estimation of the basic reproduction number  $R_0$  using dynamic mechanistic  
mathematical models ([3, 4, 5, 6]), but also simple exponential growth models  
(see e.g. [7, 8]). Compartmental epidemiological models like SIR, SIRD, SEIR  
and SEIRD have been proposed to estimate other important epidemiological  
parameters, such as the transmission rate and for forecasting purposes (see e.g.  
40 [6, 9]). Other studies have used metapopulation models, which include data  
of human mobility between cities and/or regions to forecast the evolution of  
the outbreak in other regions/countries far from the original epicenter in China  
[3, 10, 11, 5], including the modelling of the influence of travel restrictions and  
other control measures in reducing the spread ([12]).

45 Among the perplexing problems that mathematical models face when they  
are used to estimate epidemiological parameters and to forecast the evolution of  
the outbreak, two stand out: (a) the uncertainty that characterizes the actual  
number of infected cases in the total population, which is mainly due to the  
large percentage of asymptomatic or mild cases experiencing the disease like

50 the common cold or the flu (see e.g. [13]), and (b) the uncertainty regarding the DAY-ZERO of the outbreak, the knowledge of which is crucial to assess the stage and dynamics of the epidemic, especially during the first growth period.

To cope with the above problems, we herein propose a novel SEIRD with two compartments, one modelling the total infected cases in the population and  
55 another modelling the confirmed cases. The proposed modelling approach is applied to Lombardy, the epicenter of the outbreak in Italy, to estimate the scale of under-reporting of the number of actual cases in the total population, the DAY-ZERO of the outbreak and for forecasting purposes. The above tasks were accomplished by the numerical solution of a mixed-integer optimization  
60 problem using the publicly available data of cumulative cases for the period February 21-March 8, the day of lockdown of all of Italy.

## Methodology

### *The modelling approach*

We address a compartmental SEIRD model that includes two categories of  
65 infected cases, namely the confirmed/reported and the unreported (unknown) cases in the total population. Based on observations and studies, our modelling hypothesis is that the confirmed cases of infected are only a (small) subset of the actual number of infected cases in the total population [5, 13, 6]. Regarding the confirmed cases of infected as of February 11, a study conducted by the Chinese  
70 CDC which was based on a total of 72,314 cases in China, about 80.9% of the cases were mild and could recover at home, 13.8% severe and 4.7% critical [14].

On the basis of the above findings, in our modelling approach, the unreported cases were considered either asymptomatic or mildly symptomatic cases that recover from the disease relatively soon and without medical care, while the  
75 confirmed cases include all the above types, but on average their recovery lasts longer than the non-confirmed, they may also be hospitalized and die from the disease.

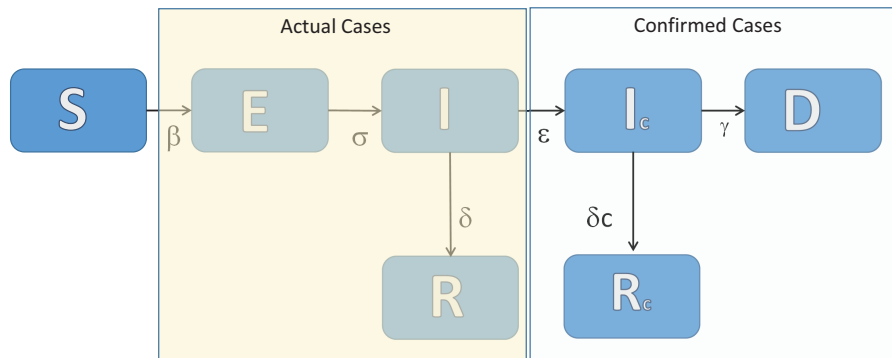

Figure 1: A schematic of the proposed compartmental SEIRD model. The actual number of cases are unknown.

Based on the above, let us consider a well-mixed population of size  $N$ . The state of the system at time  $t$ , is described by (see also Figure 1 for a schematic)

80  $S(t)$  representing the number of susceptible persons,  $E(t)$  the number of exposed,  $I(t)$  the number of unreported infected persons in the total population who are asymptomatic or experience mild symptoms and recover relatively soon without any other complications,  $I_c(t)$  the number of confirmed infected cases who may develop more severe symptoms and a part of them dies,  $R(t)$  the

85 number of recovered persons in the total population,  $R_c(t)$  the number of confirmed recovered cases and  $D(t)$  the number of deaths. For our analysis, and for such a short period, we assume that the total number of the population remains constant. Based on demographic data, the total population of Lombardy is  $N = 10m$ ; its surface area is  $23,863.09 \text{ km}^2$  and the population density is

90  $sim 422$  (Inhabitants/ $\text{Km}^2$ ).

The rate at which a susceptible ( $S$ ) becomes exposed ( $E$ ) to the virus is proportional to the density of infectious persons  $I$  in the total population, excluding the number of dead persons  $D$ . Our main assumption here is that upon confirmation, the infected persons  $I_c$  go into quarantine, and, thus, they don't

95 transmit further the disease. The proportionality constant is the “effective” disease transmission rate, say  $\beta = \bar{c}p$ , where  $\bar{c}$  is the average number of con-

tacts per day and  $p$  is the probability of infection upon a contact between a susceptible and an infected.

Thus, our discrete mean field compartmental SEIRD model reads:

$$S(t) = S(t-1) - \frac{\beta}{N-D(t)} S(t-1)I(t-1) \quad (1)$$

$$E(t) = E(t-1) + \frac{\beta}{N-D(t)} S(t-1)I(t-1) - \sigma E(t-1) \quad (2)$$

$$I(t) = I(t-1) + \sigma E(t-1) - \delta I(t-1) - \epsilon I(t-1) \quad (3)$$

$$I_c(t) = I_c(t-1) + \epsilon I(t-1) - \delta_c I_c(t-1) - \gamma I_c(t-1) \quad (4)$$

$$R(t) = R(t-1) + \delta I(t-1) \quad (5)$$

$$R_c(t) = R_c(t-1) + \delta_c I_c(t-1) \quad (6)$$

$$D(t) = D(t-1) + \gamma I_c(t-1) \quad (7)$$

100 The above system is defined in discrete time points  $t = 1, 2, \dots$ , with the corresponding initial condition at the very start of the outbreak (DAY-ZERO):  $S(0) = N - 1$ ,  $I(0) = 1$ ,  $E(0) = 0$ ,  $I_c(0) = 0$ ,  $R(0) = 0$ ,  $R_c(0) = 0$ ,  $D(0) = 0$ .

The parameters of the model are:

- $\beta(d^{-1})$  is the “effective” transmission rate of the disease,
- 105 •  $\sigma(d^{-1})$  is the average per-day “effective” rate at which an exposed person becomes infective,
- $\delta(d^{-1})$  is the average per-day “effective” recovery rate within the group of unreported (asymptomatic/mild) cases in the total population,
- $\delta_c(d^{-1})$  is the average per-day “effective” recovery rate within the subset  
110 of confirmed infected cases
- $\gamma(d^{-1})$  is the average per-day “effective” mortality rate within the subset of confirmed infected cases,
- $\epsilon(d^{-1})$  is the per-day rate of the all cases of infected in the total population that get confirmed. This proportionality rate quantifies the uncertainty

115 in the actual number of unreported cases in the total population.

Here, we should note the following: As new cases of recovered and dead at each time  $t$  appear with a time delay (which is generally unknown but an estimate can be obtained by clinical studies) with respect to the corresponding infected cases, the above per-day rates are not the actual ones; thus, they are  
120 denoted as “effective/apparent” rates.

The values of the epidemiological parameters  $\sigma$ ,  $\delta$ ,  $\delta_c$  that were fixed in the proposed model were chosen based on clinical studies.

In particular, in many studies that use SEIRD models, the parameter  $\sigma$  is set equal to the inverse of the mean incubation period (time from exposure to the  
125 development of symptoms) of a virus. *However, the incubation period does not generally coincide with the time from exposure to the time that someone starts to be infectious.* Regarding COVID-19, it has been suggested that an exposed person can be infectious well before the development of symptoms [15]. With respect to the incubation period for SARS-CoV-2, a study in China [16] suggests  
130 that it may range from 2–14 days, with a median of 5.2 days. Another study in China, using data from 1,099 patients with laboratory-confirmed 2019-nCoV ARD from 552 hospitals in 31 provinces/provincial municipalities suggested that the median incubation period is 4 days (interquartile range, 2 to 7). In our model, as explained above,  $\frac{1}{\sigma}$  represents the period from exposure to the  
135 onset of the contagious period. Thus, based on the above clinical studies, for our simulations, we have set  $\frac{1}{\sigma} = 3$ .

Regarding the recovery period, the WHO-China Joint Mission in a study that is based on 55,924 laboratory-confirmed cases has reported a median time of 2 weeks from onset to clinical recovery for mild cases, and 3-6 weeks for severe  
140 or critical cases [17]. Based on the above and on the fact that within the subset of confirmed cases the mild cases are the 81% [14], we have set the recovery period for the confirmed cases’ compartment to be  $\delta_c = 1/21$  in order to balance the recovery period with the corresponding characterization of the cases (mild, severe/critical). The average recovery period of the unreported/non-confirmed



145 part of the infected population, which in our assumptions experiences the disease like the flu or a common cold, is set equal to one week [18], i.e. we have set  $\delta = 1/7$ .

Note, that per-day mortality rate in the model does not coincide with the case fatality (mortality) ratio (CFR) which is usually reported and computed as  
150 the ratio between the reported deaths and the cumulative number of infected. Furthermore, the transmission rate cannot be obtained by clinical studies, but only by mathematical models.

Finally, regarding DAY-ZERO in Lombardy, what has been reported is just the date on which the first infected person was confirmed to be positive for  
155 SARS-CoV-2. That day was February 21, 2020, which is the starting date of public data release of confirmed cases.

*Estimation of the DAY-ZERO of the outbreak, the scale of data uncertainty, the disease transmission and mortality rates*

In order to provide a coarse estimation of the scale of under-reporting of  
160 the number of actual cases in the total population, we have considered five indicative values of the corresponding variable  $\epsilon$  (0.01, 0.05, 0.1, 0.15, 0.2). Thus, for each one of the above values of  $\epsilon$ , the DAY-ZERO of the outbreak, the per-day “effective” transmission rate  $\beta$  and the “effective” per-day mortality rate  $\gamma$ , were computed by the numerical solution of a mixed-integer optimization  
165 problem with the aid of genetic algorithms to fit the reported data of confirmed cumulative cases from February 21 to March 8, the day of the lockdown of Lombardy.

Here, for our computations, we have used the genetic algorithm “ga” provided by the Global Optimization Toolbox of Matlab [4] to minimize the fol-  
170 lowing objective function:

$$f(t_0, \alpha, \gamma) = \underset{t_0, \alpha, \gamma}{\operatorname{argmin}} \left\{ \sum_{t=t_0}^{\text{February29}} (w_1 f_t((t_0, \alpha, \gamma | \beta, \beta_c, \delta, \delta_c, \epsilon))^2 + w_2 g_t((t_0, \alpha, \gamma | \beta, \beta_c, \delta, \delta_c, \epsilon))^2 + w_3 h_t((t_0, \alpha, \gamma | \beta, \beta_c, \delta, \delta_c, \epsilon))^2) \right\}, \quad (8)$$

where

$$\begin{aligned} f_t(t_0, \alpha, \gamma | \beta, \beta_c, \delta, \delta_c, \epsilon) &= \sum \Delta I^{SEIRD}(t) - \sum \Delta I(t), \\ g_t(t_0, \alpha, \gamma | \beta, \beta_c, \delta, \delta_c, \epsilon) &= \sum \Delta R^{SEIRD}(t) - \sum \Delta R(t), \\ h_t(t_0, \alpha, \gamma | \beta, \beta_c, \delta, \delta_c, \epsilon) &= \sum \Delta D^{SEIRD}(t) - \sum \Delta D(t) \end{aligned} \quad (9)$$

where,  $\sum \Delta X^{SEIRD}(t)$ , ( $X = I, R, D$ ) are the cumulative cases resulting from the SEIRD simulator at time  $t$ ;  $w_1, w_2, w_3$  correspond to scalars serving in the general case as weights to the relevant functions.

In order to get the 90% confidence intervals for  $\beta$  and  $\gamma$  (as these are not provided by the genetic algorithm), we fixed the DAY-ZERO for the simulations and run the Levenberg-Marquard around the optimal solution as implemented by the “lsqnonlin” function of matlab [19].

For the optimization procedure, we set as initial guesses (the intervals within which the optimal estimates were sought are also given in parentheses): for the DAY-ZERO ( $t_0$ ) the 16th of January (1st January-15th of February),  $\beta=0.5$  (0.1-0.95),  $\gamma = 0.01$  (0.001-0.05).

Thus, for each one of the five values of *epsilon*, we have repeated the above numerical optimization procedure fifty times and we kept the best fitting outcome.

At this point we should note that the above optimization problem may in principle have more than one near-optimal solutions, which may be attributed to the fact that the tuning of both DAY-ZERO and the transmission rate may in essence result in nearby values of the objective function. As a consequence, starting from different sets of optimal values for DAY-ZERO and the transmission rate (the closer DAY-ZERO is to the day of the initial report of the data,

the larger the transmission rate will be and vice versa), simulations may result in numbers of cases that differ significantly.

*Estimation of the basic reproduction number  $R_0$  from the SEIRD model*

Initially, when the spread of the epidemic starts, all the population is considered to be susceptible, i.e.  $S \approx N$ . On the basis of this assumption, we computed the basic reproduction number based on the estimates of the epidemiological parameters computed using the data from the 21st of February to the 8th of March with the aid of the SEIRD model given by Eq.(1)-(7) as follows.

Note that there are three infected compartments, namely  $E, I, I_c$  that determine the outbreak. Thus, considering the corresponding equations given by Eq.(2),(3),(4), and that at the very first days of the epidemic  $S \approx N$  and  $D \approx 0$ , the Jacobian of the system as evaluated at the disease-free state reads:

$$\mathbf{J} = \frac{\partial(E(t), I(t), I_c(t))}{\partial(E(t-1), I(t-1), I_c(t-1))} = \begin{bmatrix} 1 - \sigma & \beta & 0 \\ \sigma & 1 - (\delta + \epsilon) & 0 \\ 0 & -\epsilon & 1 - (\delta_c + \gamma) \end{bmatrix} = \begin{bmatrix} 1 & 0 & 0 \\ 0 & 1 & 0 \\ 0 & 0 & 1 \end{bmatrix} + \begin{bmatrix} -\sigma & \beta & 0 \\ \sigma & -(\delta + \epsilon) & 0 \\ 0 & \epsilon & -(\delta_c + \gamma) \end{bmatrix} \quad (10)$$

The eigenvalues (that is the roots of the characteristic polynomial of the Jacobian matrix) dictate if the disease-free equilibrium is stable or not, that is if an emerging infectious disease can spread in the population. In particular, the disease-free state is stable, meaning that an infectious disease will not result in an outbreak, if and only if all the norms of the eigenvalues of the Jacobian  $\mathbf{J}$  of the discrete time system are bounded by one. Jury's stability criterion [20] (the analogue of Routh-Hurwitz criterion for discrete-time systems) can be used to determine the stability of the linearized discrete time system by analysis of

the coefficients of its characteristic polynomial. The characteristic polynomial of the Jacobian matrix reads:

$$F(z) = a_3 z^3 + a_2 z^2 + a_1 z + a_0 \quad (11)$$

where

$$\begin{aligned} a_3 &= 1 \\ a_2 &= \delta + \delta_c + \epsilon + \gamma + \sigma - 3 \\ a_1 &= \delta\delta_c - 2\delta_c - 2\epsilon - 2\gamma - 2\sigma - 2\delta + \delta_c\epsilon + \delta\gamma + \epsilon\gamma - \beta\sigma + \delta\sigma + \delta_c\sigma + \epsilon\sigma + \gamma\sigma + 3 \\ a_0 &= \delta + \delta_c + \epsilon + \gamma + \sigma - \delta\delta_c - \delta_c\epsilon - \delta\gamma - \epsilon\gamma + \beta\sigma - \delta\sigma - \delta_c\sigma - \epsilon\sigma - \gamma\sigma - \beta\delta_c\sigma + \\ &\quad \delta\delta_c\sigma - \beta\gamma\sigma + \delta_c\epsilon\sigma + \delta\gamma\sigma + \epsilon\gamma\sigma - 1 \end{aligned} \quad (12)$$

215 The necessary conditions for stability read:

$$F(1) > 0 \quad (13)$$

$$(-1)^3 F(-1) > 0 \quad (14)$$

The sufficient conditions for stability are given by the following two inequalities:

$$|a_0| < a_3 \quad (15)$$

$$|b_0| > |b_2|, \quad (16)$$

where,

$$b_0 = \begin{vmatrix} a_0 & a_3 \\ a_3 & a_0 \end{vmatrix}, b_2 = \begin{vmatrix} a_0 & a_1 \\ a_3 & a_2 \end{vmatrix} \quad (17)$$

It can be shown that the second necessary condition (14) and the first sufficient condition (15) are always satisfied for the range of values of the epidemi-

220 logical parameters considered here.

The first inequality (13) results in the necessary condition:

$$\frac{\beta}{\delta + \epsilon} < 1 \quad (18)$$

It can be also shown that for the range of the parameters considered here, the second sufficient condition (16) is satisfied if the necessary condition (18) is satisfied. Thus, the necessary condition (18) is also a sufficient condition for  
225 stability. Hence, the disease-free state is stable, if and only if, condition (18) is satisfied.

Note that in this necessary and sufficient condition (18), the first term in the parenthesis, i.e.  $\frac{1}{(\delta+\epsilon)}$  is the average infection time of the compartment  $I$ . Thus, the above expression reflects the basic reproduction number  $R_0$  which is  
230 qualitatively defined by  $R_0 = \beta \frac{1}{\text{infection time}}$ . Hence, our model results in the following expression for the basic reproduction number:

$$R_0 = \frac{\beta}{\delta + \epsilon} \quad (19)$$

Note that for  $\epsilon = 0$ , the above expression simplifies to  $R_0$  for the simple SIR model.

#### *Model Validation and Forecasting*

235 To validate the model as resulting for the estimated level of scaling, we used it to forecast the confirmed reported cases from March 9 to March 19, 2020, and then to forecast the fade-out of the outbreak in the region.

Our estimation regarding the as of March 8 reduction of the “effective” transmission rate was based on the combined effects of prevention efforts and  
240 behavioral changes. In particular, our estimation was based both on (a) mobile phone data tracing actual human mobility, and (b) an assessment of the synergistic effects of such control measures as the implementation of preventive containment in workplaces, stringent “social distancing”, and the ban on social gatherings, as well as the public awareness campaign prompting people

245 to adopt cautious behaviors to reduce the risk of disease transmission (see also [21, 22, 23, 24]).

Regarding mobility on the basis of mobile phone data, on March 17 the vice-president of Lombardy announced that the average mobility in the region (for distances more than 500 meters) had been reduced by 60% with respect to the  
250 period before the lockdown [25]. Based on this percentage, the vice-president of Lombardy asked the government to assume even stringer mobility restrictions. A further reduction may be attributed to behavioral changes. For example, it has been shown that social distancing and cautiousness reduce the disease transmission rate by about 20% [23]. On March 20, the government announced  
255 the implementation of even stricter measures that include the closing of all parks, walking only around the residency and not even in pairs, and the prohibition of mobility to second houses [26]. Extra measures were announced on March 21, including the closure of all public and private offices, and the prohibition of any pedestrian activity, even individually [27].

260 Thus, based on the above, it is reasonable to consider an 80% (60% contribution of the mobility + 20% for the effect of social distancing) reduction in the effective transmission rate for the period March 8-March 19, and an additional 10% reduction for the period after March 20-21 due to the draconian measures taken then. Based on the above, we attempted a forecasting of the fade out of  
265 the outbreak.

## Results

As discussed in the Methodology, we used five different values of  $\epsilon$  (0.01, 0.05, 0.1, 0.15, 0.2) to assess the actual number of cases in the total population. Thus, for our computations, we run 50 times the numerical optimization procedure  
270 and for further analysis we kept the value of  $\epsilon$  that gave the smaller fitting error over all runs. In particular, by using the genetic algorithm as described in the Methodology, the best fitting to the reported data was obtained with  $\epsilon=0.05$  (best fitting residual norm of the objective function: 301,392). For this scale

of under-reporting, we present the results for DAY-ZERO, the “effective” per-  
275 day transmission and mortality rates as computed with the reported data from  
February 21 to March 8. The solution of the mixed-integer optimization problem  
for the DAY-ZERO and the “effective” per-day transmission and mortality rates  
of the compartmental SEIRD model resulted in the following values (with  $w_1=1$ ,  
 $w_2=4$ ,  $w_3=16$  to balance for the different scales of the number of infected vs.  
280 the number of recovered and dead).

For the computed “effective” per-day transmission and mortality rates, we  
also report the corresponding 90% confidence intervals instead of the more stan-  
dard 95% CI because of the small size of the data. Under this scenario, the  
DAY-ZERO for the outbreak in Lombardy was found to be the 21st of January.  
285 The “effective” per-day transmission rate was found to be  $\beta = 0.779$  (90% CI:  
0.777-0.781) and the “effective” per-day mortality rate for the confirmed cases  
was found to be  $\gamma = 0.0174$  (90% CI: 0.0154-0.0193). Based on the derived  
value of the “effective” per-day disease transmission rate, the basic reproduc-  
tion number was found to be  $R_0 = 4.04$  (90% CI: 4.03-4.05).

290 Thus, based on the computed expression for  $R_0$ , the “effective” per-day  
transmission rate should have been below  $\sim 0.19$ , implying that the average  
contacts per person should have dropped by at least  $\sim 75\%$  for the outbreak to  
fade out at the initial stage.

Using these estimated values for the epidemiological parameters, we ran the  
295 simulator from DAY-ZERO (21st of January) to March 8. On March 8, simu-  
lations resulted in the following numbers for the cumulative cases:  $\sum \Delta E(t) =$   
66,016,  $\sum \Delta I(t) = 37,691$ ,  $\sum \Delta I_c(t) = 4,232$ ,  $R(t) = 12,123$ ,  $R_c(t) = 623$ ,  
 $D(t) = 221$ . The reported cumulative numbers for the day of lockdown were  
 $\sum \Delta I_c(t) = 4,189$ ,  $R_c = 550$ ,  $\sum D(t) = 267$ . Figures (2),(3),(4) depict the sim-  
300 ulation results based on the optimal estimates, starting from the 21st of January  
to the 8th of March. As shown, the predictions of the model are quite close to  
the reported number of confirmed cases for that period.

Thus, according to the above results, on the 8th of March, the actual cu-  
mulative number of infected cases in the total population (taking into account

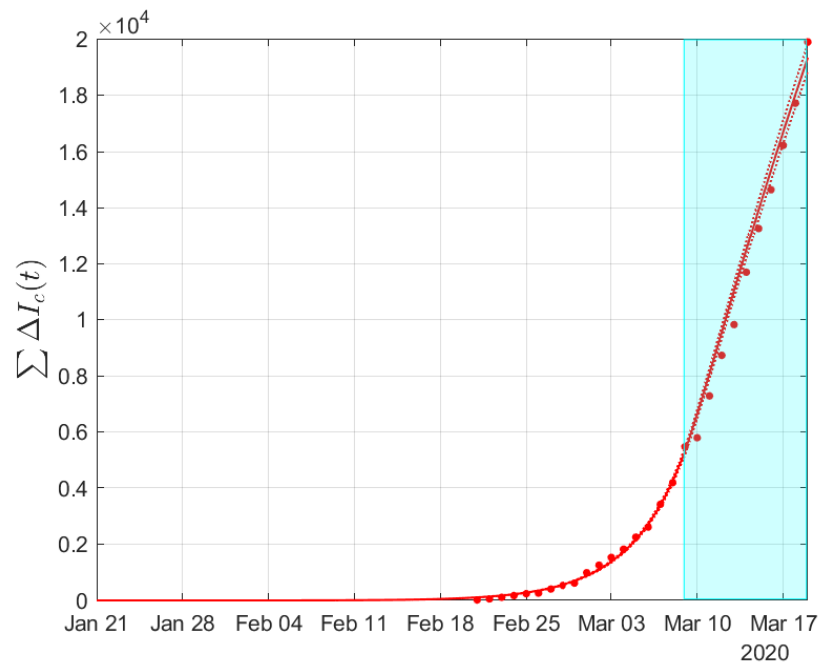

Figure 2: Cumulative number of (confirmed) infected cases resulting from simulations from DAY-ZERO (January 21) until the 19th of March. The DAY-ZERO,  $\beta = 0.779$ ,  $\gamma = 0.0174$  were computed by solving the mixed-integer optimization problem for the period DAY-ZERO to March 8. The validation of the model was performed using the reported data of confirmed cases from March 9 to March 19 (shaded area) by taking a 80% reduction in the “effective” transmission rate (see Methodology) to the lockdown of March 8. Dots correspond to the reported data of confirmed cases. Dotted lines depict the upper and lower limits of the estimation.



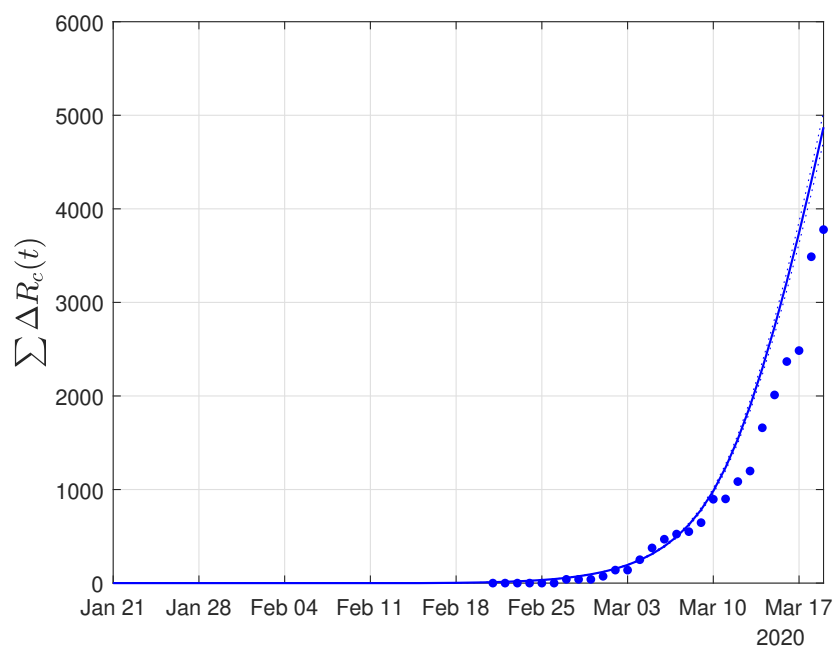

Figure 3: Cumulative number of (confirmed) recovered cases resulting from simulations from DAY-ZERO (January 21) until the 19th of March. The DAY-ZERO,  $\beta = 0.779$ ,  $\gamma = 0.0174$  were computed by solving the mixed-integer optimization problem for the period DAY-ZERO to March 8. The validation of the model was performed using the reported data of confirmed cases from March 9 to March 19 (shaded area) by taking a 80% reduction in the “effective” transmission rate (see Methodology) to the lockdown of March 8. Dots correspond to the reported data of confirmed cases. Dotted lines depict the upper and lower limits of the estimation.

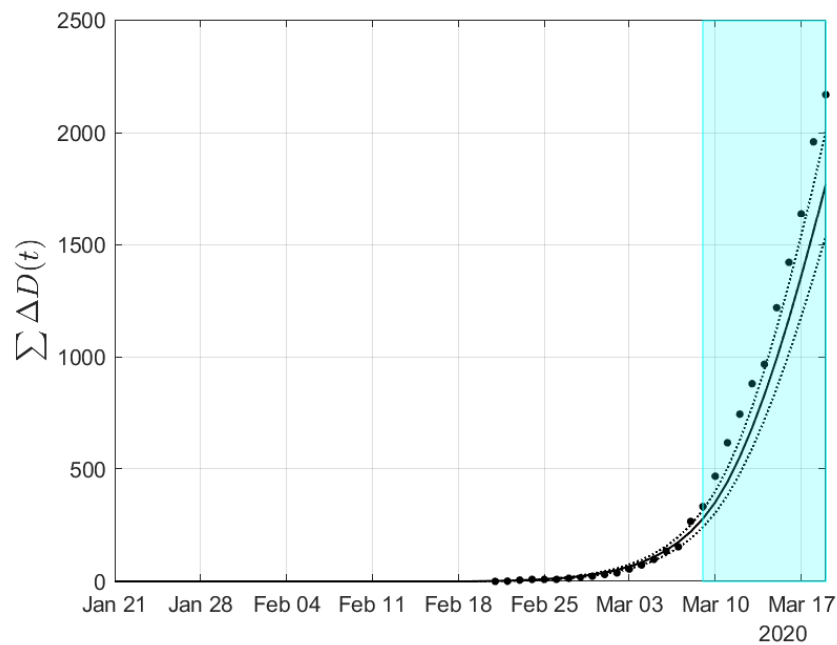

Figure 4: Cumulative number of (confirmed) deaths resulting from simulations from DAY-ZERO (January 21) until the 19th of March. The DAY-ZERO,  $\beta = 0.779$ ,  $\gamma = 0.0174$  were computed by solving the mixed-integer optimization problem for the period DAY-ZERO to March 8. The validation of the model was performed using the reported data of confirmed cases from March 9 to March 19 (shaded area) by taking a 80% reduction in the “effective” transmission rate (see Methodology) to the lockdown of March 8. Dots correspond to the reported data of confirmed cases. Dotted lines depict the upper and lower limits of the estimation.

305 the exposed cases to the virus) was of the order of 15 times more the confirmed cumulative number of infected cases.

To validate the model with respect to the reported data of confirmed cases from March 9 to March 19, we have considered an 80% reduction in the “effective” transmission rate and as initial conditions the values resulting from the simulation on March 8. Based on the above, the model yielded the following numbers for the cumulative cases for March 19:  $\sum \Delta E(t) = 112,659$ ,  $\sum \Delta I(t) = 99,951$ ,  $\sum \Delta I_c(t) = 19,327$ ,  $R(t) = 55,263$ ,  $R_c(t) = 4,872$ ,  $D(t) = 1,770$  (the reported confirmed cumulative numbers on March 16 were  $\sum \Delta I_c(t) = 19,884$ ,  $R_c = 3,778$ ,  $D(t) = 2,168$ ). Thus, the model predicted fairly well the period from March 9 to March 19.

315 As discussed in the Methodology, we also attempted to forecast the evolution of the outbreak based on our analysis. To do so, we have considered a 90% reduction in the effective transmission rate starting on March 20, the day of announcement of even stricter measures in the region of Lombardy. The result of our forecast is depicted in Figure 5. As predicted by simulations, if the strict isolation measures continue to hold, the outbreak in Lombardy is expected to fade out by the end of May, 2020 (lower and upper limits of the estimations are also shown).

## Discussion

325 The crucial questions about an outbreak is how, when (DAY-ZERO), why it started, and when it will end. Answers to these important questions would add critical knowledge in our arsenal to combat the pandemic. The tracing of DAY-ZERO, in particular, is of outmost importance. It is well known that minor perturbations in the initial conditions of a complex system, such as the ones of an outbreak, may result in major changes in the observed dynamics. No doubt, a high level of uncertainty for DAY-ZERO, as well as the uncertainty in the actual numbers of exposed people in the total population, raise several barriers in our ability to correctly assess the state and dynamics of the outbreak, and to

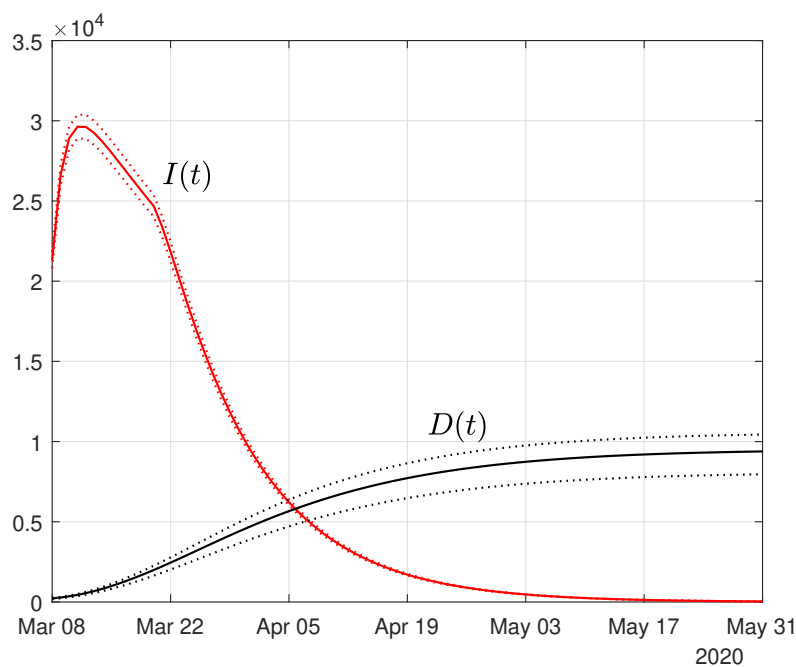

Figure 5: Estimated number of the actual infected cases in the total population and the deaths at each day resulting from simulations from March 8 (the day of the lockdown of all Italy) to May 31 by considering a 80% reduction of the “effective” transmission rate until March 19 (based on the drop in the mobility in Lombardy as estimated by real-mobile phone data and the effect of social distancing) and then another 10% due to the even stricter measures for mobility announced by the government on March 20 and March 21. Dotted lines depict the upper and lower limits of the estimation.

forecast its evolution and its end. Such pieces of information would lower the  
335 barriers and help public health authorities respond fast and efficiently to the  
emergency.

This study aimed exactly at shedding more light into this problem, taking  
advantage of state-of-the-art tools of mathematical modelling and numerical  
analysis/optimization tools. To achieve this goal, we addressed a new compart-  
340 mental SEIRD with two infectious compartments in order to bridge the gap  
between the number of reported cases and the actual number of cases in the  
total population.

By following the proposed methodological framework, we found that the  
DAY-ZERO in Lombardy was the 21th of January, a date that precedes by one  
345 month the fate of the first confirmed case in the hardest-hit northern Italian  
region of Lombardy. Furthermore, our analysis revealed that the actual cumu-  
lative number of infected cases in the total population in the period until March  
8 was around 15 times the cumulative number of confirmed infected cases. In-  
terestingly enough, regarding the estimation of the DAY-ZERO of the outbreak  
350 in Lombardy, a study posted in MedRxiv the same day as ours, reports the same  
time period, between the second half of January and early February, 2020, as  
the time when the novel coronavirus entered Northern Italy, based on genomic  
and phylogenetic analyses [28].

Regarding the forecasting of the fade out of the pandemic in the region  
355 of Lombardy, in the first version of this manuscript that was submitted to  
MedRxiv on March 17 and posted on March 20, we considered a 90% drop in the  
“effective” transmission rate as of March 8. This percentage is close enough to  
the drop that is estimated by real mobile data and studies quantifying the effect  
of social distancing and cautiousness (totaling 80%). In this current version,  
360 we updated our results by considering the new facts about the drop of human  
mobility as announced on March 17 by the vice-president of the region and  
the new draconian measures announced on May 20-21 that include the closure  
of all parks, public and private offices and the prohibition of any pedestrian  
activity, even individually [27]. We predict that the fade-out of the outbreak in

365 Lombardy will be by the end of May, if the draconian, as of March 20-21, social  
isolation measures are implemented and maintained.

To this end, we would like to make a final comment with respect to the basic  
reproduction number  $R_0$ , the significance and meaning of which are very often  
misinterpreted and misused, thereby leading to erroneous conclusions. Here, we  
370 found an  $R_0 \sim 4$ , which is similar to the values reported by many studies in  
China. For example, Zhao et al. estimated  $R_0$  to range between 2.24 (95% CI:  
1.96-2.55) and 3.58 (95% CI: 2.89-4.39) in the early phase of the outbreak [7].  
Similar estimates, were obtained for  $R_0$  by Imai et al. 2.6 (95% CI: 1.5-3.5) [4],  
Li et al. [29], Wu et al. 2.68 (95% CI: 2.47-2.86), as well as by Anastassopoulou  
375 et al. recently 3.1 (90% CI: 2.5-3.7) [6].

However, we would like to stress that  $R_0$  is NOT a biological constant for a  
disease as it is affected not only by the pathogen, but also by many other factors,  
such as environmental conditions, the demographics as well as, importantly, by  
the social behavior of the population (see for example the discussion in [30]).  
380 Thus, a value for  $R_0$  that is found in a part of world (and even in a region of the  
same country) cannot be generalized as a global biological constant for other  
parts of world (or even for other regions of the same country). Obviously, the  
environmental factors and social behavior of the population in Lombardy are  
different from the ones, for example, prevailing in Hubei.

385 We hope that the results of our analysis help to mitigate some of the severe  
consequences of the currently uncontrolled pandemic.

### **Conflict of Interest**

The authors declare no conflict of interest.

### **Funding**

390 We did not receive any specific funding for this study.

## Data Availability

The data used in this paper are given in the Supporting information.

## Author Contributions

Constantinos Siettos performed the formal numerical analysis and computa-  
395 tions. Lucia Russo contributed to the development of the model and the formal  
analysis. Gennaro Nicola Bifulco analysed and collected the data. Gerardo  
Toraldo and Emilio Fortunato Campana contributed to the numerical analysis  
and optimization procedure. Cleo Anastassopoulou and Athanassios Tsakris in-  
terpreted the epidemiological meaning of the results. Constantinos Siettos , Cleo  
400 Anastassopolou and Lucia Russo wrote the manuscript. All authors reviewed  
the manuscript.

## References

- [1] W. H. Organization, Coronavirus disease 2019 (COVID-19). Situation report 51 (2020).  
URL [https://www.who.int/docs/default-source/coronaviruse/situation-reports/20200311-sitrep-51-covid-19.pdf?sfvrsn=1ba62e57\\_10](https://www.who.int/docs/default-source/coronaviruse/situation-reports/20200311-sitrep-51-covid-19.pdf?sfvrsn=1ba62e57_10)
- [2] F. Carinci, Covid-19: preparedness, decentralisation, and the hunt for patient zero, *BMJ* 368. doi:10.1136/bmj.m799.  
URL <https://www.bmj.com/content/368/bmj.m799>
- [3] J. T. Wu, K. Leung, G. M. Leung, Nowcasting and forecasting the potential domestic and international spread of the 2019-nCoV outbreak originating in wuhan, china: a modelling study, *The Lancet* doi:10.1016/S0140-6736(20)30260-9.  
URL <https://doi.org/10.1016%2Fs0140-6736%2820%2930260-9>

- [4] N. Imai, A. Cori, I. Dorigatti, et al., Report 3: Transmissibility of 2019-nCoV, *Int J Infect Dis* doi:10.1016/j.ijid.2020.01.050.  
URL <https://www.imperial.ac.uk/media/imperial-college/medicine/sph/ide/gida-fellowships/Imperial-2019-nCoV-transmissibility.pdf>
- [5] D. Li, J. Lv, G. Botwin, J. Braun, W. Cao, L. Li, D. P. McGovern, Estimating the scale of covid-19 epidemic in the united states: Simulations based on air traffic directly from wuhan, china, medRxiv doi: 10.1101/2020.03.06.20031880.  
URL <https://www.medrxiv.org/content/early/2020/03/08/2020.03.06.20031880>
- [6] C. Anastassopoulou, L. Russo, A. Tsakris, C. Siettos, Data-based analysis, modelling and forecasting of the covid-19 outbreak doi:10.1101/2020.02.11.20022186.  
URL <https://www.medrxiv.org/content/early/2020/03/12/2020.02.11.20022186>
- [7] S. Zhao, Q. Lin, J. Ran, S. S. Musa, G. Yang, W. Wang, Y. Lou, D. Gao, L. Yang, D. He, M. H. Wang, Preliminary estimation of the basic reproduction number of novel coronavirus (2019-nCoV) in china, from 2019 to 2020: A data-driven analysis in the early phase of the outbreak, *Int J Infect Dis* doi:10.1101/2020.01.23.916395.  
URL <https://doi.org/10.1101/2020.01.23.916395>
- [8] A. Remuzzi, G. Remuzzi, COVID-19 and italy: what next?, *The Lancet* doi:10.1016/s0140-6736(20)30627-9.  
URL [https://doi.org/10.1016/s0140-6736\(20\)30627-9](https://doi.org/10.1016/s0140-6736(20)30627-9)
- [9] W.-K. Ming, J. Huang, C. J. P. Zhang, Breaking down of the healthcare system: Mathematical modelling for controlling the novel coronavirus (2019-nCoV) outbreak in wuhan, china doi:10.1101/2020.01.27.922443.  
URL <https://doi.org/10.1101/2020.01.27.922443>



- [10] H.-Y. Yuan, M. P. Hossain, M. M. Tsegaye, X. Zhu, P. Jia, T.-H. Wen, D. Pfeiffer, Estimating the risk on outbreak spreading of 2019-ncov in china using transportation data doi:10.1101/2020.02.01.20019984.  
URL <https://www.medrxiv.org/content/early/2020/02/04/2020.02.01.20019984>
- [11] P. M. De Salazar, R. Niehus, A. Taylor, C. O. Buckee, M. Lipsitch, Using predicted imports of 2019-ncov cases to determine locations that may not be identifying all imported cases doi:10.1101/2020.02.04.20020495.  
URL <https://www.medrxiv.org/content/early/2020/02/11/2020.02.04.20020495>
- [12] M. Chinazzi, J. T. Davis, M. Ajelli, C. Gioannini, M. Litvinova, S. Merler, A. P. y Piontti, K. Mu, L. Rossi, K. Sun, C. Viboud, X. Xiong, H. Yu, M. E. Halloran, I. M. Longini, A. Vespignani, The effect of travel restrictions on the spread of the 2019 novel coronavirus (COVID-19) outbreak, Science (2020) eaba9757 doi:10.1126/science.aba9757.  
URL <https://doi.org/10.1126%2Fscience.aba9757>
- [13] CNBC, Current US coronavirus cases are “just the tip of the iceberg,” former USAID director says. (2020).  
URL <https://www.cnbc.com/2020/03/05/us-coronavirus-cases-just-the-tip-of-the-iceberg-ex-usaid-director.html>
- [14] T. N. C. P. E. R. E. Team, The epidemiological characteristics of an outbreak of 2019 novel coronavirus diseases (covid-19) in china, 2020, China CDC Weekly 2 (2020) 113.  
URL <http://weekly.chinacdc.cn//article/id/e53946e2-c6c4-41e9-9a9b-fea8db1a8f51>
- [15] C. for Disease Control, Prevention, How COVID-19 Spreads (2020).  
URL <https://www.cdc.gov/coronavirus/2019-ncov/about/transmission.html>

- [16] Q. Li, X. Guan, P. Wu, et al. Wang, Early transmission dynamics in wuhan, china, of novel coronavirus infected pneumonia, *New England Journal of Medicine* 0 (0) (0) null. doi:10.1056/NEJMoa2001316.  
URL <https://doi.org/10.1056/NEJMoa2001316>
- [17] W. H. Organization, Report of the WHO-China Joint Mission on Coronavirus Disease 2019 (COVID-19) (2020).  
URL <https://www.who.int/docs/default-source/coronaviruse/who-china-joint-mission-on-covid-19-final-report.pdf>
- [18] t. . F. Fernando Duarte, BBC. [link].  
URL <https://www.cdc.gov/flu/symptoms/symptoms.htm>
- [19] The Mathworks, Inc., Natick, Massachusetts, MATLAB R2018b (2018).
- [20] E. I. Jury, L. Stark, V. V. Krishnan, Inners and stability of dynamic systems, *IEEE Transactions on Systems, Man, and Cybernetics SMC-6* (10) (1976) 724–725. doi:10.1109/tsmc.1976.4309436.  
URL <https://doi.org/10.1109%2Ftsmc.1976.4309436>
- [21] W. H. Organization, Advancing the right to health: the vital role of law, World Health Organization, 2016.
- [22] C. ping Su, M. A. de Perio, K. J. Cummings, A.-B. McCague, S. E. Luckhaupt, M. H. Sweeney, Case investigations of infectious diseases occurring in workplaces, united states, 2006–2015, *Emerging Infectious Diseases* 25 (3) (2019) 397–405. doi:10.3201/eid2503.180708.  
URL <https://doi.org/10.3201%2Feid2503.180708>
- [23] P. Caley, D. J. Philp, K. McCracken, Quantifying social distancing arising from pandemic influenza, *Journal of The Royal Society Interface* 5 (23) (2007) 631–639. doi:10.1098/rsif.2007.1197.  
URL <https://doi.org/10.1098%2Frsif.2007.1197>
- [24] M. W. Fong, H. Gao, J. Y. Wong, J. Xiao, E. Y. Shiu, S. Ryu, B. J. Cowling, Nonpharmaceutical measures for pandemic influenza in nonhealthcare

- settings—social distancing measures, *Emerging Infectious Diseases* 26 (5).  
doi:10.3201/eid2605.190995.  
URL <https://doi.org/10.3201%2Feid2605.190995>
- [25] S. Tg4, Coronavirus Lombardia, Sala: "Il 40% ancora si sposta. Si vede dalle celle telefoniche (2020).  
URL <https://tg24.sky.it/cronaca/2020/03/17/coronavirus-spostamenti-lombardia.html>
- [26] R. News, Coronavirus, nuove restrizioni. A Milano militari per le strade. Posti di blocco a Roma. (2020).  
URL <http://www.rainews.it>
- [27] R. News, Coronavirus, ordinanza Lombardia con nuove limitazioni (2020).  
URL <https://www.rainews.it>
- [28] G. Zehender, A. Lai, A. Bergna, L. Meroni, A. Riva, C. Balotta, M. Tarkowski, A. Gabrieli, D. Bernacchia, S. Rusconi, G. Rizzardini, S. Antinori, M. Galli, Genomic characterisation and phylogenetic analysis of sars-cov-2 in italy doi:10.1101/2020.03.15.20032870.  
URL <https://www.medrxiv.org/content/early/2020/03/20/2020.03.15.20032870>
- [29] Q. Li, X. Guan, P. Wu, et al., Early Transmission Dynamics in Wuhan, China, of Novel Coronavirus Infected Pneumonia (2020). doi:10.1056/NEJMoa2001316.  
URL <https://doi.org/10.1088%2F0951-7715%2F16%2F2%2F308>
- [30] P. L. Delamater, E. J. Street, T. F. Leslie, Y. T. Yang, K. H. Jacobsen, Complexity of the basic reproduction number ( $r_0$ ), *Emerging Infectious Diseases* 25 (1) (2019) 1–4. doi:10.3201/eid2501.171901.  
URL <https://doi.org/10.3201%2Feid2501.171901>

## Supporting information

All the relevant data used in this paper are publicly available and accessible at <https://lab.gedidigital.it/gedi-visual/2020/coronavirus-i-contagi-in-italia/>. In Table S1 are given the reported cumulative numbers from February 21 to March 19. The data from February 21 to March 8 have been used for the calibration of the model parameters and the data from March 9 to March 19 have been used for the validation of the model.

Table 1: Reported cumulative numbers of cases for Lombardy, Italy (February 21-March 19)

| Date     | Infected | Recovered | Deaths | Date     | Infected | Recovered | Deaths |
|----------|----------|-----------|--------|----------|----------|-----------|--------|
| Feb 21   | 15       | 0         | 0      | March 09 | 5469     | 646       | 333    |
| 22       | 54       | 0         | 1      | 10       | 5791     | 896       | 468    |
| 23       | 1101     | 0         | 6      | 11       | 7280     | 900       | 617    |
| 24       | 172      | 0         | 9      | 12       | 8725     | 1085      | 744    |
| 25       | 240      | 0         | 9      | 13       | 9820     | 1198      | 880    |
| 26       | 258      | 0         | 9      | 14       | 11685    | 1660      | 966    |
| 27       | 403      | 40        | 14     | 15       | 13272    | 2011      | 1218   |
| 28       | 531      | 40        | 17     | 16       | 14649    | 2368      | 1420   |
| 29       | 615      | 40        | 23     | 17       | 16220    | 2485      | 1640   |
| March 01 | 984      | 73        | 31     | 18       | 17713    | 3488      | 1959   |
| 02       | 1254     | 139       | 38     | 19       | 19884    | 3778      | 2168   |
| 03       | 1529     | 139       | 55     |          |          |           |        |
| 04       | 1820     | 250       | 73     |          |          |           |        |
| 05       | 2251     | 376       | 98     |          |          |           |        |
| 06       | 2612     | 469       | 135    |          |          |           |        |
| 07       | 3420     | 524       | 154    |          |          |           |        |
| 08       | 4189     | 550       | 267    |          |          |           |        |

*S1 Table..*
